# Supplementary material
Source: publisher site journal article supplement (https://www.dovepress.com/get_supplementary_file.php?f=320909.docx)
Supplement: Supplementary file 1 [file get_supplementary_file.php]

**Supplementary materials**

**Table S1.** The results of K-S tests for HbA1c in the whole group and in each compared subgroup

| HbA1c | | K-S | df | p | Skew (SDskew) | KURT (SDkurt) |
| --- | --- | --- | --- | --- | --- | --- |
| Overall |  | 0.11 | 2574 | <.001 | 1.09 (0.05) | 3.69 (0.10) |
| Sex | Men | 0.12 | 1171 | <.001 | 1.20 (0.07) | 3.94 (0.14) |
|  | Women | 0.10 | 1381 | <.001 | 1.11 (0.07) | 4.00 (0.13) |
| Education | Primary | 0.09 | 884 | <.001 | 1.04 (0.08) | 3.34 (0.16) |
|  | Secondary | 0.11 | 1333 | <.001 | 1.10 (0.07) | 4.40 (0.13) |
|  | Higher | 0.11 | 340 | <.001 | 1.18 (0.13) | 3.31 (0.26) |
| Place of residence | Rural | 0.09 | 651 | <.001 | 1.01 (0.10) | 3.29 (0.19) |
|  | City | 0.11 | 998 | <.001 | 1.14 (0.08) | 4.23 (0.16) |
|  | Big city | 0.11 | 902 | <.001 | 1.20 (0.08) | 4.39 (0.16) |
| Disease duration intervals | ≤3 years | 0.10 | 245 | <.001 | 0.94 (0.16) | 2.37 (0.31) |
|  | 4-10 years | 0.12 | 1379 | <.001 | 1.31 (0.07) | 5.37 (0.13) |
|  | >10 years | 0.09 | 950 | <.001 | 1.00 (0.08) | 2.98 (0.16) |
| BMI (kg/m2) | Normal | 0.15 | 285 | <.001 | 1.59 (0.14) | 4.92 (0.29) |
|  | Overweight | 0.11 | 1160 | <.001 | 1.17 (0.07) | 5.21 (0.14) |
|  | Obesity | 0.09 | 1073 | <.001 | 0.92 (0.08) | 2.64 (0.15) |
| Copying style | Maladaptive | 0.10 | 752 | <.001 | 1.40 (0.09) | 4.43 (0.18) |
|  | Adaptive | 0.13 | 998 | <.001 | 1.16 (0.08) | 4.43 (0.16) |
|  | Mixed | 0.15 | 367 | <.001 | 1.20 (0.10) | 4.18 (0.20) |
|  | Avoidance-oriented | 0.08 | 300 | <.001 | 1.27 (0.14) | 3.90 (0.28) |
|  | Task-oriented | 0.12 | 629 | <.001 | 1.63 (0.25) | 7.37 (0.25) |
|  | Best solution-oriented | 0.12 | 248 | <.001 | 1.12 (0.16) | 4.24 (0.31) |
|  | Emotion-oriented | 0.10 | 206 | <.001 | 1.20 (0.17) | 3.15 (0.34) |

**Notes***:* BMI – body mass index;BMI categories criteria: (1) normal 18.50-24.99; (2) overweight ≥ 25; (3) Obesity ≥30; Skew – skewness; KURT – kurtosis

**Table S2. The results of K-S tests for independent continuous variables in the whole group**

|  |
| --- |

|  | K-S | df | p | Skew (SDskew) | KURT (SDkurt) |
| --- | --- | --- | --- | --- | --- |
| Age | 0.04 | 2565 | <.001 | -0.25 (0.05) | 0.27 (0.10) |
| Duration of the diabetes | 0.15 | 2574 | <.001 | 1.54 (0.05) | 6.30 (0.10) |
| Perception of self-influence on the diabetes course | 0.22 | 2434 | <.001 | -0.36 (0.05) | -0.36 (0.10) |
| Number of complications | 0.23 | 2574 | <.001 | 0.76 (0.05) | .01 (0.10) |
| Well-being (WHO-5) | 0.07 | 2524 | <.001 | -0.31(0.05) | -0.09 (0.10) |
| BMI (kg/m2) | 0.07 | 2526 | <.001 | 0.85 (0.05) | 2.11 (0.10) |

**Notes***:* BMI – body mass index;Skew – skewness; KURT – kurtosis

**Table S3.** The results of K-S tests for independent variables in each compared subgroup according to BMI category.

| Variable | BMI | K-S | df | p | Skew (SDskew) | KURT (SDkurt) |
| --- | --- | --- | --- | --- | --- | --- |
| Age | Normal | 0.05 | 277 | .100 | -0.26 (0.15) | 0.22 (0.29) |
| Overweight | 0.04 | 1126 | <.001 | -0.24 (0.07) | 0.22 (0.15) |
| Obesity | 0.04 | 1024 | <.001 | -0.20 (0.08) | 0.03 (0.15) |
| Duration of the diabetes | Normal | 0.17 | 277 | <.001 | 3.04 (0.15) | 20.69 (0.29) |
| Overweight | 0.16 | 1126 | <.001 | 1.47 (0.07) | 3.48 (0.15) |
| Obesity | 0.13 | 1024 | <.001 | 0.96 (0.08) | 1.31 (0.15) |
| Perception of self-influence on the diabetes course | Normal | 0.23 | 277 | <.001 | -0.47 (0.15) | -0.39 (0.29) |
| Overweight | 0.23 | 1126 | <.001 | -0.40 (0.07) | -0.37 (0.15) |
| Obesity | 0.21 | 1024 | <.001 | -0.32 (0.08) | -0.25 (0.15) |
| Number of complications | Normal | 0.24 | 277 | <.001 | 0.97 (0.15) | 0.52 (0.29) |
| Overweight | 0.24 | 1126 | <.001 | 0.83 (0.07) | 0.09 (0.15) |
| Obesity | 0.23 | 1024 | <.001 | 0.64 (0.08) | -0.13 (0.15) |
| Well-being  (WHO-5) | Normal | 0.10 | 277 | <.001 | -0.42 (0.15) | -0.13 (0.29) |
| Overweight | 0.08 | 1126 | <.001 | -0.35 (0.07) | -0.16 (0.15) |
| Obesity | 0.08 | 1024 | <.001 | -0.24 (0.08) | 0.03 (0.15) |

**Notes***:* BMI – body mass index; BMI categories criteria: (1) normal 18.50-24.99; (2) overweight ≥ 25; (3) Obesity ≥30. Skew – skewness; KURT – kurtosis

# **Table S4.** Summary of the results of the Kruskal Wallis-H and Mann–Whitney U test for HbA1c level according to sociodemographic, clinical and psychological variables

| **Glycated hemoglobin level HbA1c** | | | | | | | |
| --- | --- | --- | --- | --- | --- | --- | --- |
| **Variable** | **Pairwise Comparison** | ***N*** | **Mean rank** | **Statistic** | ***df*** | ***pa*** |
| **Sex** |  |  |  |  |  |  |
| Women (1) | 1-2 | 1381 | 1294.00 | *U* = 784403.0 | 1 | = .192 |
| Men (2) |  | 1171 | 1255.86 |  |  |  |
| **Education** |  |  |  |  |  |  |
| Primary (1) | 1-2 | 884 | 1443.28 | *H =* 77.42*** | 2 | < .001 |
| Secondary (2) | 2-3 | 1333 | 1221.59 | .004 |
| Higher (3) | 3-1 | 340 | 1076.96 | < .001 |
| **Place of residence** | |  |  |  |  | |
| Rural area (1) | 1-2 | 651 | 1388.69 | *H =* 44.95*** | 2 | = .157 |
| Small town (2) | 2-3 | 998 | 1316.78 | < .001 |
| Big city (3) | 3-1 | 902 | 1149.55 | < .001 |
| **BMI** **(kg/m2)** |  |  |  |  |  |  |
| Normal (1) | 1-2 | 285 | 1257.08 | *H =* 13.93*** | 2 | = .825 |
| Overweight (2) | 2-3 | 1160 | 1204.64 | = .001 |
| Obesity (3) | 3-1 | 1073 | 1319.45 | = .593 |
| **Coping styles** | | | | | | |
| Maladaptive (1) | 1-2 | 752 | 953.35 | *U* = 316705.5*** | 1 | < .001 |
| Adaptive (2) | 998 | 816.84 |
|  |  |  |  |  |  |  |
| Task-oriented (1) | 1-2 | 367 | 1139.13 | *H =* 21.77*** | 4 | = .005 |
|  | 1-3 |  |  | = .999 |
|  | 1-4 |  |  | = .007 |
|  | 1-5 |  |  | = .325 |
| Avoidance-oriented (2) | 2-3 | 300 | 1332.61 | = .020 |
|  | 2-4 |  |  | = .999 |
|  | 2-5 |  |  | = .216 |
| Best solution-oriented (3) | 3-4 | 248 | 1144.32 | = .022 |
|  | 3-5 |  |  | = .860 |
| Emotion-oriented style (4) | 4-5 | 206 | 1349.41 | = .227 |
| Mixed style (5) |  | 1337 | 1228.50 |  |

**Notes:** BMI – body mass index; BMI categories criteria: (1) normal 18.50-24.99; (2) overweight ≥ 25; (3) Obesity ≥30.

a- Bonferroni-adjusted significance tests for pairwise comparisons

*** - *p* < .001

# **Table S5.** Spearman Rank Correlation Coefficients between HbA1c and independent variables

|  | **HbA1c [%]** | | |
| --- | --- | --- | --- |
| **Variable** | **N** | ***rs*** | ***p*** |
| Age | 2565 | .001 | = .973 |
| Duration of the diabetes | 2574 | .067 | < .001 |
| Perception of self-influence on the diabetes course | 2534 | -.160 | < .001 |
| Number of complications | 2574 | .191 | < .001 |
| Well-being (WHO-5) | 2524 | -.100 | < .001 |

# **Table S6.** Summary of analysis of the Kruskal Wallis-H tests results of the sociodemographic, clinical and psychological variables in BMI (kg/m2) categories

| **BMI (kg/m2)a** | **Pairwise Comparison** | ***n*** | **Mean rank** | **Statistic** | ***df*** | ***pa*** |
| --- | --- | --- | --- | --- | --- | --- |
| **Age** | | | |  | | |
| Normal (1) | 1-2 | 884 | 1147.08 | *H =* 10.62** | 2 | = .133 |
| Overweight (2) | 2-3 | 1333 | 1243.57 | = .205 |
| Obesity (3) | 3-1 | 340 | 1299.59 | = .005 |
| **Disease duration** | | | |  | | |
| Normal (1) | 1-2 | 285 | 1171.97 | *H =* 17.70*** | 2 | = 1.000 |
| Overweight (2) | 2-3 | 1160 | 1217.44 | < .001 |
| Obesity (3) | 3-1 | 1073 | 1328.21 | = .004 |
| **Perception of self-influence on the diabetes course** | | | |  | | |
| Normal (1) | 1-2 | 281 | 1366.04 | *H =* 21.51*** | 2 | = .117 |
| Overweight (2) | 2-3 | 1144 | 1271.70 | = .003 |
| Obesity (3) | 3-1 | 1056 | 1174.47 | < .001 |
| **WHO-5 score** | | | |  | | |
| Normal (1) | 1-2 | 282 | 1283.88 |  |  | = 1.000 |
| Overweight (2) | 2-3 | 1143 | 1272.46 | *H =* 10.29** | 2 | = .009 |
| Obesity (3) | 3-1 | 1045 | 1182.02 |  |  | = .099 |

**Notes:**BMI – body mass index.

a - BMI categories criteria: normal 18.50-24.99; overweight ≥ 25; obesity ≥30.

** - p < .01; *** - p < .001

# **Table S7.** Sociodemographic and psychological characteristic by BMI categories

| **BMI** | | **Gender** | | | |
| --- | --- | --- | --- | --- | --- |
| Men (a) | | | Women (b) |
|  | Normal | 133a (11.6%) | | | 151a (11.2%) |
| Overweight | 602a (52.7%) | | | 549b (40.5%) |
| Obesity | 407a (35.6%) | | | 654b (48.3%) |
|  |  | χ*2*(2) = 43.39, *p* < .001; Cramer’s *V* = 0.132 | | | |
|  |  | **Education** | | | |
|  |  | Primary (a) | Secondary (b) | | Higher (c) |
|  | Normal | 86a (10.0%) | 147a,b (11.3%) | | 50b (15.0%) |
| Overweight | 347a (40.2%) | 635b (48.7%) | | 172b (51.7%) |
| Obesity | 431a (49.9%) | 522b (40.0%) | | 111b (33.3%) |
|  |  | *χ2*(4) = 35.7; *p* < .001; Cramer’s *V* = 0.085 | | | |
|  |  | **Place a resident** | | | |
|  |  | Rural area (a) | Small city (b) | | Big city (c) |
|  | Normal | 63a (9.9%) | 114a (11.6%) | | 105a (12.0%) |
|  | Overweight | 264a (41.4%) | 458a,b (46.7%) | | 429b (48.9%) |
|  | Obesity | 310a (48.7%) | 409b (41.7%) | | 344b (39.2%) |
|  |  | *χ2*(4) = 14.17; *p* = .007; Cramer’s *V* = 0.053 | | | |
|  |  | **Styles of coping with stress** | | | |
|  |  | Adaptive (a) | | Maladaptive (b) | |
|  | Normal | 115a (11.8%) | | 80a (10.9%) | |
|  | Overweight | 476a (48.8%) | | 302b (41.1%) | |
|  | Obesity | 384a (39.4%) | | 352b (48.0%) | |
|  |  | *Χ2*(2) = 12.86, *p* = .002; Cramer’s *V* = 0.087 | | | |

**Notes:**BMI – body mass index; BMI categories criteria: normal 18.50-24.99; overweight ≥ 25; Obesity ≥30.

a, b – for each pair of columns, the column proportions are compared using a *z*-test. If a pair of values is significantly different, the values have different subscript letters assigned to them.
